# Supplementary material for: Using Digital Pathology to Understand Epithelial Characteristics of Benign Breast Disease among Women Undergoing Diagnostic Image-Guided Breast Biopsy
Source: Oxford University Press journal article supplement (doi:10.1158/1940-6207.capr-19-0120), 2019-11-20
Supplement: 19406207capr190120-sup-218072_2_supp_5841421_pzlvs3.xlsx [file 19406207capr190120-sup-218072_2_supp_5841421_pzlvs3.xlsx]

## Sheet: Sup Table 4
Supplementary Table 4. Association between TDLU count and segmented END in tertiles among women with benign breast disease, The BREAST Stamp Project (N=223 women; 261 biopsy targets)
										Segmented END
				Overall, n=261						Benign Non-Proliferative n=89					Benign Proliferative, n=172
	T1	T2	T3	Unadjusted	Adjusted for age and BMI		T1	T2	T3	Unadjusted	Adjusted for age and BMI		T1	T2	T3	Unadjusted	Adjusted for age and BMI
TDLU measure	N=88	N=87	N=86	OR (95% CI)†	OR (95% CI)†	TDLU measure	N=31	N=28	N=30	OR (95% CI)†	OR (95% CI)†	TDLU measure	N=59	N=57	N=56	OR (95% CI)†	OR (95% CI)†
TDLU count/100 mm2						TDLU count/100 mm2						TDLU count/100 mm2
T1 (0 - 6.03)	55	21	12	Ref	Ref	T1 (0 - 1.85)	26	3	2	Ref	Ref	T1 (0 - 9.3)	32	18	9	Ref	Ref
T2 (6.04 - 24.6)	20	32	35	5.41 (2.9, 10.1)	5.27 (2.81, 9.88)	T2 (1.86 - 14.5)	2	15	11	32.89 (8.15, 132.71)	33.22 (8.60, 128.35)	T2 (9.4 - 31.3)	19	13	24	3.20 (1.51, 6.78)	2.88 (1.34, 6.17)
T3 (24.7 - 200)	13	34	39	7.25 (3.97, 13.23)	7.08 (3.77, 13.29)	T3 (14.6 - 200)	3	10	17	54.79 (11.77, 255.07)	57.85 (12.84, 260.75)	T3 (31.4 - 173)	8	26	23	4.49 (2.31, 8.72)	4.21 (2.09, 8.48)
P-trend				<0.0001	<0.0001	P-trend				<0.0001	<0.0001	P-trend				<0.0001	<0.0001
P-valueᵃ	<0.0001					P-valueᵃ	<0.0001					P-valueᵃ	<0.0001
Weighted kappa	0.31 (0.22, 0.40)					Weighted kappa	0.55 (0.41, 0.69)					Weighted kappa	0.2 (0.10, 0.32)
Note: One biopsy target (18080.svs) was excluded from any analysis pertaining to segmented END because of blurriness.
The cutoffs tertiles of segmented END among overall patients were: T1: 0 - 10278.0, T2: 10278.1 - 12674.0, T3: 12674.1 - 19039; The cutoffs for segmented END tertiles among patients with non-proliferative breast disease: T1: 0 - 9002.0, T2: 9002.1 - 12124.0, T3: 12124.1 - 19039; The cutoffs of segmented END tertiles among patients with proliferative breast disease were: T1: 0 - 10882.0, T2: 10882…
† ORs and 95% CI estimates calculated using ordinal multivariate logistic regression models. Multivariable models adjusted for age and BMI as categorized trends. P-trend <0.05 are presented in bold font.
ᵃ P-value from Chi-square test except where noticed. P-value less than 0.05 are bold.
BMI, body mass index; CI, confidence interval; END, epithelial nuclear density; OR, odds ratio; TDLU, terminal duct lobular unit, T, tertile.
