# Supplementary material for: Using Digital Pathology to Understand Epithelial Characteristics of Benign Breast Disease among Women Undergoing Diagnostic Image-Guided Breast Biopsy
Source: Oxford University Press journal article supplement (doi:10.1158/1940-6207.capr-19-0120), 2019-11-20
Supplement: 19406207capr190120-sup-218072_2_supp_5841422_pz7vs3.xlsx [file 19406207capr190120-sup-218072_2_supp_5841422_pz7vs3.xlsx]

## Sheet: Sup Table 1
Suplementary table 1. Associations between END and patient characteristics among women with benign breast disease, overall and by biopsy diagnosis subtypes, The BREAST Stamp Project (n=224 women; 262 biopsy targets).
							END
		Overall, N=262				Non-proliferative disease, N=90				Proliferative disease, N=172
Characteristics		T1	T2	T3		T1	T2	T3		T1	T2	T3
	N (%)	n (%)	n (%)	n (%)		n (%)	n (%)	n (%)		n (%)	n (%)	n (%)
Age at mammogram (years)
≤ 50	135 (51.5)	47 (52.8)	36 (41.4)	52 (60.5)		16 (51.6)	15 (51.7)	16 (53.3)		30 (50.9)	23 (41.1)	35 (61.4)
> 50	127 (48.5)	42 (47.2)	51 (58.6)	34 (39.5)		15 (48.4)	14 (48.3)	14 (46.7)		29 (49.2)	33 (58.9)	22 (38.6)
P-value				0.041				0.99				0.097
Race
White, non-Hispanic race	244 (93.1)	84 (94.4)	80 (92.0)	80 (93.0)		30 (96.8)	27 (93.1)	27 (90.0)		55 (93.2)	51 (91.1)	54 (94.7)
Others	18 (6.9)	5 (5.6)	7 (8.1)	6 (7.0)		1 (3.2)	2 (6.9)	3 (10.0)		4 (6.8)	5 (8.9)	3 (5.3)
P-value				0.82				0.60ᵃ				0.76ᵃ
Education
<College/graduate school degree	36 (13.9)	17 (19.1)	11 (12.9)	8 (9.4)		7 (22.6)	5 (17.9)	3 (10.0)		12 (20.3)	4 (7.3)	5 (8.9)
College/graduate school degree	223 (86.1)	72 (80.9)	74 (87.1)	77 (90.6)		24 (77.4)	23 (82.1)	27 (90.0)		47 (79.7)	51 (92.7)	51 (91.1)
Missing	3	0	2	1		0	1	0		0	1	1
P-value				0.17				0.42				0.067
BMI, kg/m2
<25	133 (50.8)	39 (43.8)	46 (52.9)	48 (55.8)		13 (41.9)	13 (44.8)	13 (43.3)		27 (45.8)	35 (62.5)	32 (56.1)
25-<30	75 (28.6)	30 (33.7)	26 (29.9)	19 (22.1)		14 (45.2)	11 (37.9)	7 (23.3)		17 (28.8)	11 (19.6)	15 (26.3)
30+	54 (20.6)	20 (22.5)	15 (17.2)	19 (22.1)		4 (12.9)	5 (17.2)	10 (33.3)		15 (25.4)	10 (17.9)	10 (17.5)
P-value				0.38				0.24				0.45
Age at menarche (years)
≤12	97 (37.7)	35 (39.8)	33 (39.8)	29 (33.7)		11 (35.5)	9 (34.6)	11 (36.7)		24 (41.4)	23 (41.8)	19 (33.3)
13	102 (39.7)	35 (39.8)	33 (39.8)	34 (39.5)		13 (41.9)	13 (50.0)	13 (43.3)		23 (39.7)	18 (32.7)	22 (38.6)
14+	58 (22.6)	18 (20.5)	17 (20.5)	23 (26.7)		7 (22.6)	4 (15.4)	6 (20.0)		11 (19.0)	14 (25.5)	16 (28.1)
Missing	5	1	4	0		0	3	0		1	1	0
P-value				0.82				0.96				0.71
Parity
Nulliparous	69 (26.3)	23 (25.8)	23 (26.4)	23 (26.7)		9 (29.0)	8 (27.6)	11 (36.7)		15 (25.4)	13 (23.2)	13 (22.8)
1	39 (14.9)	16 (18.0)	13 (14.9)	10 (11.6)		5 (16.1)	3 (10.3)	6 (20.0)		11 (18.6)	8 (14.3)	6 (10.5)
2	92 (35.1)	25 (28.1)	32 (36.8)	35 (40.7)		5 (25.8)	12 (41.4)	6 (20.0)		15 (25.4)	24 (42.9)	27 (47.4)
3+	62 (23.7)	25 (28.1)	19 (21.8)	18 (20.9)		9 (29.0)	6 (20.7)	7 (23.3)		18 (30.5)	11 (19.6)	11 (19.3)
P-value				0.62				0.67ᵃ				0.28
Age at first birth (years)
Nulliparous	69 (26.5)	23(25.8)	23 (27.1)	23 (26.7)		9 (29.0)	8 (28.6)	11 (36.7)		15 (25.4)	13 (23.6)	13 (22.8)
<30	136 (52.3)	48 (53.9)	50 (58.8)	38 (44.2)		19 (61.3)	16 (57.1)	14 (46.7)		31 (52.5)	32 (58.2)	24 (42.1)
30+	55 (21.2)	18 (20.2)	12 (14.1)	25 (29.1)		3 (9.7)	4 (14.3)	5 (16.7)		13 (22.0)	10 (18.2)	20 (35.1)
Missing	2	0	2	0		0	1	0		0	1	0
P-value				0.17				0.82ᵃ				0.28
Age at menopause (years)
≤ 50	54 (21.6)	15 (17.7)	25 (30.5)	14 (16.9)		7 (24.1)	7 (25.9)	7 (24.1)		10 (17.5)	14 (26.9)	9 (16.1)
> 50	30 (12.0)	13 (15.3)	10 (12.2)	7 (8.4)		2 (6.9)	3 (11.1)	3 (10.3)		10 (17.5)	8 (15.4)	4 (7.1)
Premenopausal	166 (66.4)	57 (67.1)	47 (57.3)	62 (74.7)		20 (69.0)	17 (63.0)	19 (65.5)		37 (64.9)	30 (57.7)	43 (76.8)
Missing	12	4	5	3		2	2	1		2	4	1
P-value				0.091				0.99				0.21
Menopausal status
Premenopausal	166 (63.4)	57 (64)	47 (54)	62 (72.1)		20 (64.5)	17 (58.6)	19 (63.3)		37 (62.7)	30 (53.6)	43 (75.4)
Postmenopausal	96 (36.6)	32 (36)	40 (46)	24 (27.9)		11 (35.5)	12 (41.4)	11 (36.7)		22 (37.3)	26 (46.4)	14 (24.6)
P-value				0.047				0.88				0.052
Menopausal hormone therapy use
Never	193 (76.3)	68 (79.1)	60 (69.8)	65 (80.3)		23 (76.7)	23 (82.1)	22 (75.9)		45 (79.0)	36 (65.5)	44 (81.5)
Ever	60 (23.7)	18 (20.9)	26 (30.2)	16 (19.8)		7 (23.3)	5 (17.9)	7 (24.1)		12 (21.1)	19 (34.6)	10 (18.5)
Missing	9	3	1	5		1	1	1		2	1	3
P-value				0.21				0.82				0.11
Cigarette Smoking, 100+ cigarettes/lifetime
Never	136 (54.4)	41 (50.6)	42 (50.0)	53 (62.4)		18 (60.0)	11 (37.9)	20 (66.7)		24 (46.2)	31 (58.5)	32 (57.1)
Former	86 (34.4)	29 (35.8)	32 (38.1)	25 (29.4)		6 (20.0)	14 (48.3)	7 (23.3)		23 (44.2)	17 (32.1)	19 (33.9)
Current	28 (11.2)	11 (13.6)	10 (11.9)	7 (8.2)		6 (20.0)	4 (13.8)	3 (10.0)		5 (9.6)	5 (9.4)	5 (8.9)
Missing	12	8	3	1		1	0	0		7	3	1
P-value				0.46				0.097ᵃ				0.71ᵃ
Breast biopsy prior to enrollment
Never	166 (63.9)	58 (65.2)	57 (66.3)	51 (60)		19 (61.3)	24 (82.8)	16 (53.3)		39 (66.1)	35 (63.6)	33 (58.9)
Ever	94 (36.2)	31 (34.8)	29 (33.7)	34 (40)		12 (38.7)	5 (17.2)	14 (47.7)		20 (33.9)	20 (36.4)	23 (41.1)
Missing	2	0	1	1		0	0	0		0	1	1
P-value				0.66				0.049				0.72
Family history of breast cancer in 1st degree female relative
None	195 (75.3)	67 (76.1)	59 (67.8)	69 (82.1)		25 (83.3)	22 (75.9)	20 (69.0)		41 (69.5)	39 (69.6)	48 (85.7)
1+	64 (24.7)	21 (23.9)	28 (32.2)	15 (17.9)		5 (16.7)	7 (24.1)	9 (31.0)		18 (30.5)	17 (30.4)	8 (14.3)
Missing	3	1	0	2		1	0	1		0	0	1
P-value				0.092				0.43				0.074
Biopsy type
Ultrasound-guided	111 (42.4)	43 (48.3)	33 (37.9)	35 (40.7)		22 (77.0)	16 (55.2)	17 (56.7)		21 (35.6)	14 (25.0)	21 (36.8)
Stereotactic-guided	150 (57.3)	46 (51.7)	54 (62.1)	50 (58.1)		9 (29.0)	13 (44.8)	13 (43.3)		38 (64.4)	42 (75.0)	35 (61.4)
Both	1 (0.4)	0	0	1 (1.2)		0	0	0		0	0	1 (1.8)
P-value				0.36ᵇ				0.38				0.31ᵇ
Note: The cutoffs of END tertiles among overall patients were: T1: 3842 - 9598.0, T2: 9598.1 - 10674.0, T3: 10674.1 - 13757; The cutoffs of END tertiles among patients with non-proliferative breast disease were: T1: 3842 - 9178.0, T2: 9178.1 - 10569.0, T3: 10569.1 - 13461; The cutoffs of END tertiles among patients with proliferative breast disease were: T1: 4069 - 9751.0, T2: 9751.1 - 10749.0, T…
ᵃ P-values from Fisher exact test.
ᵇ One patient with both biopsy types was excluded from analysis.
BMI, body mass index; END, epithelial nuclear density.
