# Supplementary material for: Using Digital Pathology to Understand Epithelial Characteristics of Benign Breast Disease among Women Undergoing Diagnostic Image-Guided Breast Biopsy
Source: Oxford University Press journal article supplement (doi:10.1158/1940-6207.capr-19-0120), 2019-11-20
Supplement: 19406207capr190120-sup-218072_2_supp_5841423_pzcvs3.xlsx [file 19406207capr190120-sup-218072_2_supp_5841423_pzcvs3.xlsx]

## Sheet: Sup Table 2a
Suplementary table 2a. Associations between TDLU measures and END tertiles among women with benign breast disease, by menopausal status, The BREAST Stamp Project (N=224 women; 262 biopsy targets).
							END
				Premenopausal patients, n=166							Postmenopausal patients, n=96		Among parous women, n=193 biopsy targets
	T1	T2	T3	Unadjusted	Adjusted for age and BMI			T1	T2	T3	Unadjusted	Adjusted for age and BMI		T1	T2	T3	Unadjusted	Adjusted for age and BMI
TDLU measure	N=56	N=55	N=55	OR (95% CI)†	OR (95% CI)†		TDLU measure	N=32	N=32	N=32	OR (95% CI)†	OR (95% CI)†	TDLU measure	N=66	N=64	N=63	OR (95% CI)†	OR (95% CI)†
TDLU count/100 mm2							TDLU count/100 mm2						TDLU count/100 mm2
T1 (0 - 10.5)	25	19	13	Ref	Ref		T1 (0 - 4.0)	10	9	14	Ref	Ref	T1 (0 - 6.05)	29	23	15	Ref	Ref
T2 (10.6 - 31.6)	20	22	12	1.18 (0.61, 2.28)	1.23 (0.62, 2.43)		T2 (4.1 - 14.8)	15	12	5	0.37 (0.15, 0.94)	0.38 (0.15, 0.96)	T2 (6.06 - 24.8)	22	23	13	1.15 (0.60, 2.19)	1.14 (0.59, 2.20)
T3 (31.7 - 200)	11	14	30	3.84 (1.85, 7.96)	3.90 (1.82, 8.36)		T3 (14.9 - 173)	7	11	13	1.16 (0.44, 3.08)	1.24 (0.46, 3.35)	T3 (24.9 - 200)	15	18	35	3.32 (1.70, 6.48)	3.23 (1.62, 6.43)
P-trend				0.0005	0.0008		P-trend				0.77	0.67	P-trend				0.0006	0.0015
Weighted kappa	0.24 (0.12, 0.36)						Weighted kappa	0.04 (-0.12, 0.20)					P-valuea	0.0013
The cutoffs of END tertiles among premenopausal patients were: T1: 3842 - 9592.0, T2: 9592.1 - 10760.0, T3: 10760.1 - 13757; The cutoffs of END tertiles among postmenopausal patients were: T1: 7065 - 9600.0, T2: 9600.1 - 10541.0, T3: 10541.1 - 13349. The cutoffs of END tertiles among overall patients were: T1: 3842 - 9598.0, T2: 9598.1 - 10674.0, T3: 10674.1 - 13757. END tertile cut points were n…
† ORs and 95% CI estimates calculated using ordinal multivariate logistic regression models. Multivariable models adjusted for age and BMI as categorized trends. P-trend <0.05 are presented in bold font.
ᵃ P-value is from Chi-square test. P-value less than 0.05 is in bold font.
BMI, body mass index; CI, confidence interval; END, epithelial nuclear density; OR, odds ratio; TDLU, terminal duct lobular unit; T, tertile.
