# Supplementary material for: Using Digital Pathology to Understand Epithelial Characteristics of Benign Breast Disease among Women Undergoing Diagnostic Image-Guided Breast Biopsy
Source: Oxford University Press journal article supplement (doi:10.1158/1940-6207.capr-19-0120), 2019-11-20
Supplement: 19406207capr190120-sup-218072_2_supp_5842124_pzj9hk.docx [file 19406207capr190120-sup-218072_2_supp_5842124_pzj9hk.docx]

**SUPPLEMENTARY FIGURES AND TABLE LEGENDS**

**Supplementary Figure 1.** Scatterplots showing the associations between END and (A) TDLU counts (B) TDLU span and (C) TDLU acini, all as continuous variables.

**Supplementary Figure 2** Scatterplots showing the associations between END and (A) percent fibroglandular volume (B) localized percent peri-lesional volume and (C) localized lesional volume. all as continuous variables.

**Supplementary Table 1.** Associations between END and patient characteristics among women with benign breast disease, overall and by biopsy diagnosis subtypes, The BREAST Stamp Project (n=224 women; 262 biopsy targets).

**Supplementary Table 2a**. Associations between TDLU measures and END tertiles among women with benign breast disease, by menopausal status, The BREAST Stamp Project (N=224 women; 262 biopsy targets).

**Supplementary Table 2b**. Associations between END tertiles and mammographic density measures, among women with benign breast disease, by menopausal status, The BREAST Stamp Project (N=224 women; 262 biopsy targets).

**Supplementary Table 3.** Associations between END tertiles and absolute MD measures among women with benign breast disease, overall and by biopsy diagnosis subtypes, The BREAST Stamp Project (N=224 women; 262 biopsy targets).

**Supplementary Table 4.** Association between TDLU count and segmented END in tertiles among women with benign breast disease, The BREAST Stamp Project (N=223 women; 261 biopsy targets).
